# Supplementary material for: Homologous Drought-Induced 19 Proteins, PtDi19-2 and PtDi19-7, Enhance Drought Tolerance in Transgenic Plants
Source: MDPI journal article supplement (doi:10.3390/ijms23063371), 2022-03-21
Supplement: s1 [file s1]

Supplementary Materials:

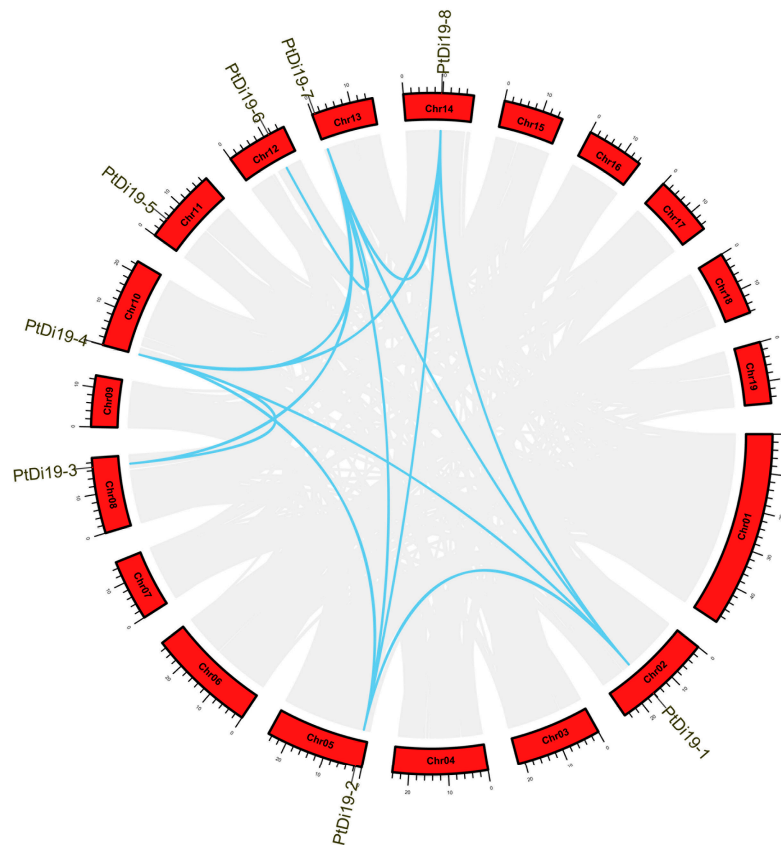

**Figure S1.** Chromosomal localizations and duplications of Di19 genes on *P. trichocarpa* chromosomes, of which the segmental duplicated Di19 genes indicated with blue lines.

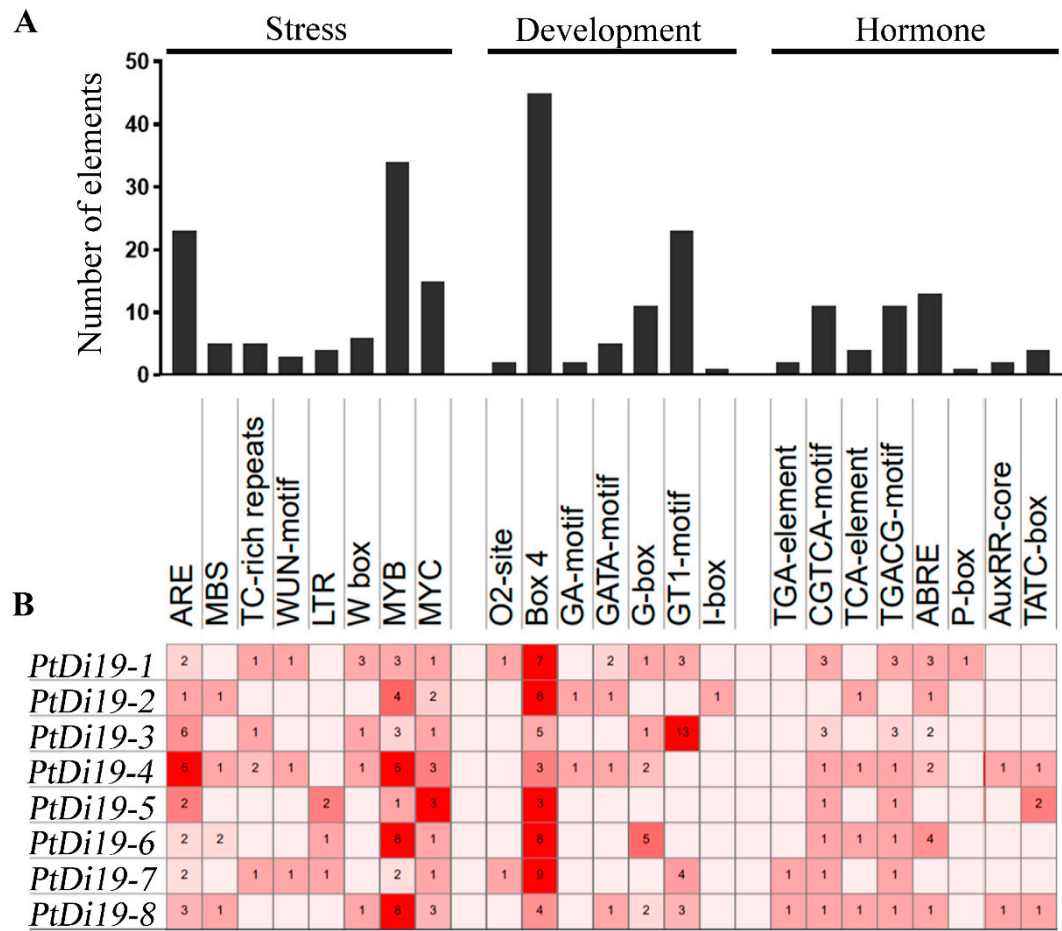

**Figure S2.** Various cis-acting elements in *PtDi19* genes. **(A)** The number of cis-acting elements in response to various factors. **(B)** The number of occurrences of each cis-acting elements.



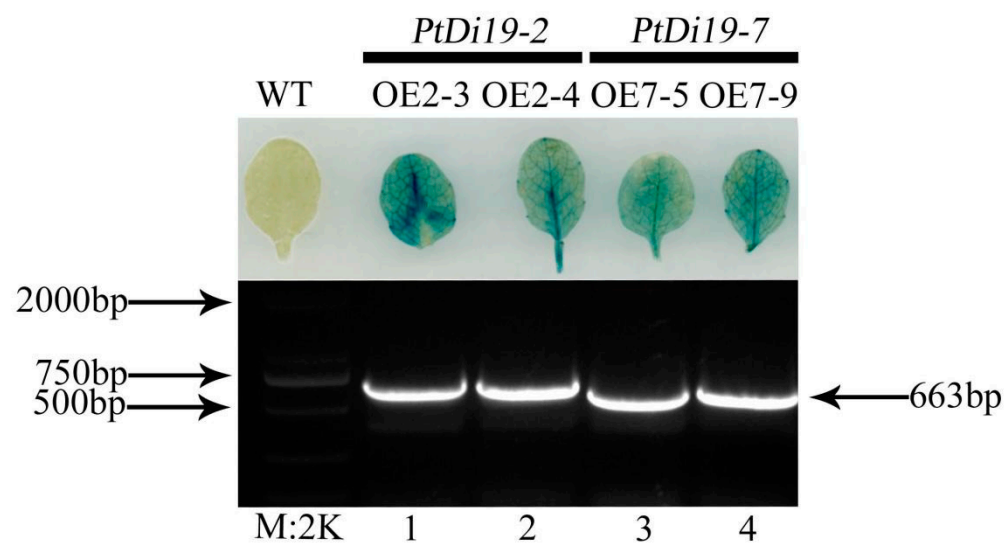

**Figure S4.** Identification of *PtDi19-2* and *PtDi19-7* transgenic *Arabidopsis*.

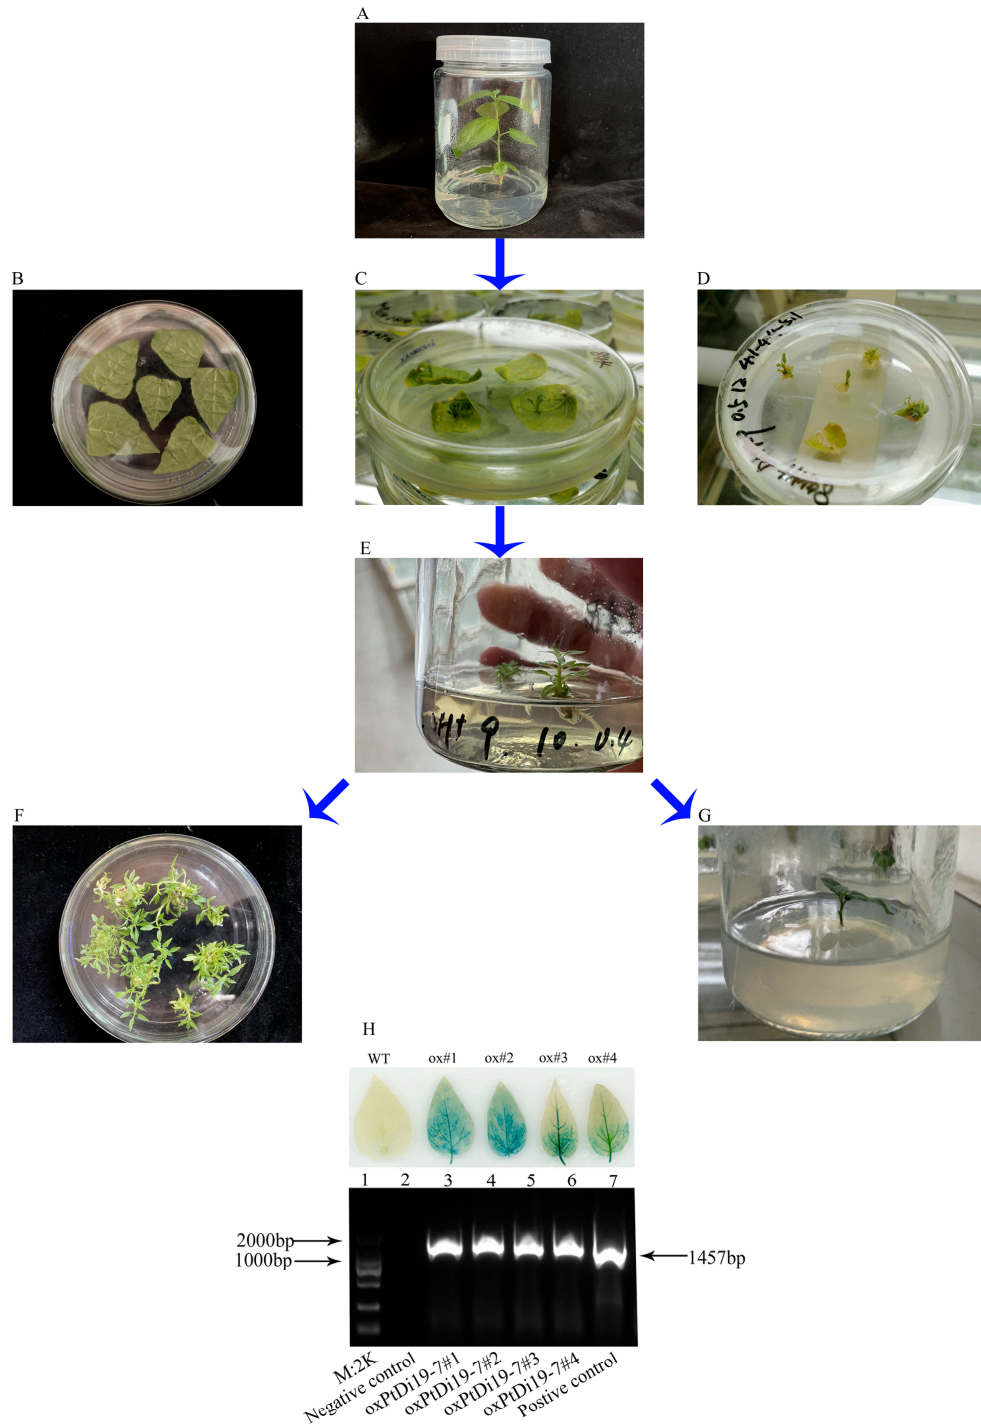

**Figure S5.** Acquisition and validation of *PtDi19-7* positive plants. **(A)** One-month old tissue culture plantlets of wild-type poplar 84K. **(B)** After infection, 84K poplar leaves were put into co-culture medium for dark culture. **(C)** After three days of dark culture, the leaves were placed into screening differentiation medium. **(D)** The differentiated buds were placed in bud elongation medium. **(E)** The elongated buds were placed in the screening rooting medium. **(F)** Put the leaves into the propagation medium for differentiation. **(G)** The stem segments were inserted into the rooting medium for propagation. **(H)** The four lines were identified by GUS staining and PCR.

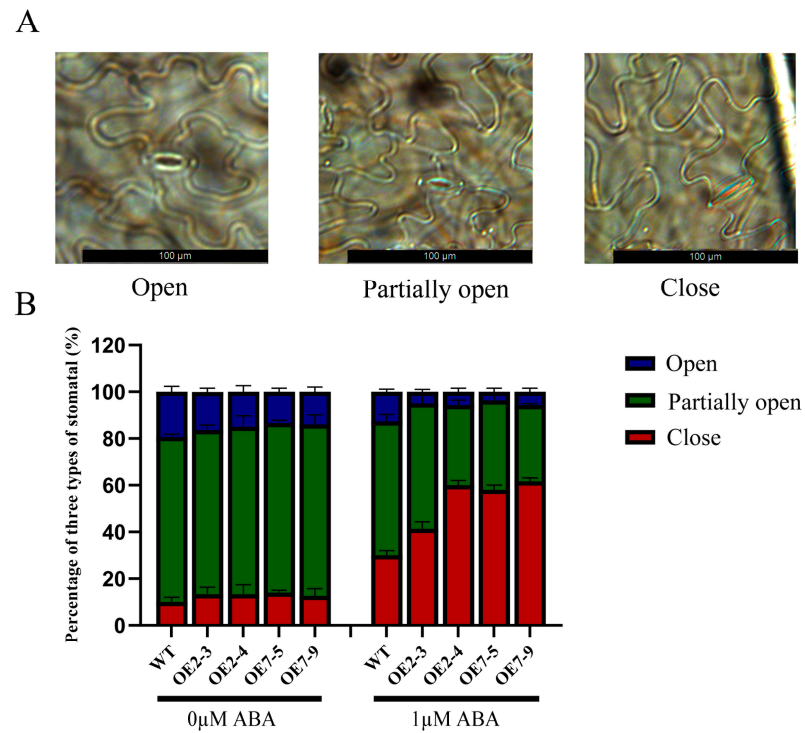

**Figure S6.** ABA-induced stomatal closure in transgenic *Arabidopsis*. **(A)** Scanning electron microscopy images of three types of stomatal apertures. **(B)** The percentage of three types of stomatal apertures in the leaves of transgenic and WT plants under normal and 1  $\mu$ M ABA treatment.

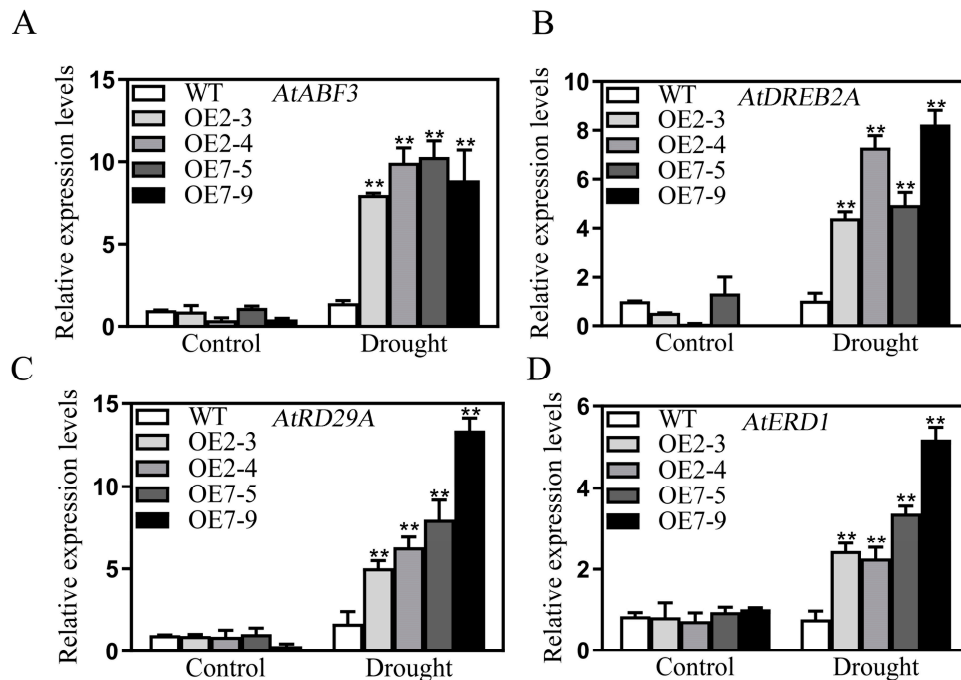

**Figure S7.** Expression of ABA/drought-related genes of *PtDi19-2* and *PtDi19-7* overexpression in *Arabidopsis*. The transcript levels of *AtABF3* **(A)**, *AtDREB2A* **(B)**, *AtRD29A* **(C)** and *AtERD1* **(D)** measured by qRT-PCR under unstressed conditions or drought treatment for 10 d. \*\*  $p < 0.01$ .

**Table S1.** Drought-induced 19 (Di19) identified in *P. trichocarpa* and collected about related physical information.

| Name            | Gene Identifier  | Chr | Location coordinates<br>(5'- 3') | ORF            | Protein         |      |                 |       |
|-----------------|------------------|-----|----------------------------------|----------------|-----------------|------|-----------------|-------|
|                 |                  |     |                                  | length<br>(bp) | Length<br>(aa.) | PI   | Mol.Wt.<br>(Da) | Exons |
| <i>PtDi19-1</i> | Potri.002G200500 | 2   | 16159751--16164658               | 678            | 225             | 4.44 | 25425.1         | 5     |
| <i>PtDi19-2</i> | Potri.005G020900 | 5   | 1607415--1611963                 | 663            | 220             | 5.77 | 24360.65        | 5     |
| <i>PtDi19-3</i> | Potri.008G213400 | 8   | 16819228--16821768               | 645            | 214             | 5.2  | 23840.53        | 5     |
| <i>PtDi19-4</i> | Potri.010G000800 | 10  | 98928--101749                    | 648            | 215             | 5.23 | 23974.8         | 5     |
| <i>PtDi19-5</i> | Potri.011G057200 | 11  | 5042374--5046433                 | 702            | 233             | 6.17 | 26389.41        | 5     |
| <i>PtDi19-6</i> | Potri.012G086500 | 12  | 11356226--11359696               | 627            | 208             | 6.23 | 22994.5         | 5     |
| <i>PtDi19-7</i> | Potri.013G011200 | 13  | 704912--709386                   | 663            | 220             | 5.58 | 24326.49        | 5     |
| <i>PtDi19-8</i> | Potri.014G125500 | 14  | 9660838--9664353                 | 672            | 223             | 4.47 | 25116.84        | 5     |

**Table S2.** Ka/Ks value for duplicate Di19 genes in *P. trichocarpa*.

| Pt/Pt                    | Ka          | Ks          | Ka/Ks       | Duplication date<br>(million years) |
|--------------------------|-------------|-------------|-------------|-------------------------------------|
| <i>PtDi19-1/PtDi19-2</i> | 0.347256236 | 1.65487904  | 0.209837836 | 55.16263467                         |
| <i>PtDi19-1/PtDi19-7</i> | 0.360892376 | 1.394709067 | 0.258758177 | 46.49030223                         |
| <i>PtDi19-1/PtDi19-8</i> | 0.062087142 | 0.307389753 | 0.201981822 | 10.2463251                          |
| <i>PtDi19-1/PtDi19-4</i> | 0.393649989 | 2.249275657 | 0.175011892 | 74.97585523                         |
| <i>PtDi19-2/PtDi19-7</i> | 0.031228281 | 0.300922206 | 0.103775264 | 10.0307402                          |
| <i>PtDi19-2/PtDi19-4</i> | 0.291104633 | 1.778188465 | 0.163708538 | 59.27294883                         |
| <i>PtDi19-3/PtDi19-4</i> | 0.050059836 | 0.202274308 | 0.247484894 | 6.742476933                         |
| <i>PtDi19-3/PtDi19-7</i> | 0.299337727 | 1.278989763 | 0.234042317 | 42.6329921                          |
| <i>PtDi19-4/PtDi19-7</i> | 0.268509127 | 1.695637705 | 0.158352888 | 56.52125683                         |
| <i>PtDi19-6/PtDi19-7</i> | 0.689255171 | 3.088808691 | 0.223145957 | 102.9602897                         |
| <i>PtDi19-7/PtDi19-8</i> | 0.344690151 | 1.635918177 | 0.21070134  | 54.5306059                          |
| <i>PtDi19-8/PtDi19-4</i> | 0.401384399 | 1.72237506  | 0.233041228 | 57.412502                           |

**Table S3.** Details of conservative motifs

| Motif | Length | Sequence information                     |
|-------|--------|------------------------------------------|
| 1     | 41     | DDLRAEFPCPCYEDFDIVGLCCHJDEEHPVEAKNGVCPVC |
| 2     | 32     | LSJLRKELREGNLQSLGSSCIVSSSNAAPD           |
| 3     | 21     | RVGVDMVAHITLQHGNJFKSQ                    |
| 4     | 21     | DQEEKAKRSEFVQGILLSTIL                    |
| 5     | 11     | LLSSFILNFPD                              |
| 6     | 11     | MDSDSWTSRLA                              |
| 7     | 15     | YQSALQSRSDLFMGF                          |
| 8     | 11     | RKRRLRRGGSP                              |
| 9     | 29     | SKQPSLSSETSSAKKSSDENVLERNVQSS            |
| 10    | 13     | AAKRQYALQHHP                             |
| 11    | 29     | YDAHLQVLLGDGGYRSNNTVGNVSHTATD            |
| 12    | 14     | SHLDRLGIDDFEVE                           |
| 13    | 14     | NSSAKRAAPSHMWK                           |
| 14    | 6      | EEIDGD                                   |
| 15    | 11     | KSKCYKDEPYP                              |
| 16    | 6      | LQNWKT                                   |
| 17    | 15     | RKSQKSGAWTGSSAM                          |
| 18    | 12     | YFEGPPQCMGRN                             |
| 19    | 15     | YRLEEAAKYQSGPCQ                          |
| 20    | 6      | NFWFRP                                   |

**Table S4.** Fluorescence quantitative primer sequence collection

| Name            | Forward primers        | Reverse primers        |
|-----------------|------------------------|------------------------|
| <i>UBQ10</i>    | GTTGATTTTTGCTGGGAAGC   | GATCTTGGCCTTCACGTTGT   |
| <i>PtDi19-1</i> | GTGCACAGCCTAGTTTATCAAG | CTGTACGAACTCACTTCTCCTT |
| <i>PtDi19-2</i> | AATGGGAATGTATCAAACGCAG | GAACCGCAAGTAAAAGTCTCTG |
| <i>PtDi19-3</i> | CTCGCTTCTCAACTTCTTCAAG | ACCAACAACATCAAAATCCTCG |
| <i>PtDi19-4</i> | CGTAAGAGAAGATTGCGAAAGG | GAGCTTGCTTCAACAGAAGAAA |
| <i>PtDi19-5</i> | AGTCTAAAGTCGCCGTTTGTCC | CCCTAACAGCACTTGCAGATGA |
| <i>PtDi19-6</i> | CAGCATGATGAACCTTTCAACA | GCAAAGCTCTAGAAGATCGTTG |
| <i>PtDi19-7</i> | GGACAGACTTACTTTCAAGTCA | AATTTCTTGACGCTAACAAGGC |
| <i>PtDi19-8</i> | CTTGGCACCTGATCCATTATTG | CCTGTACGAACTCACTTCTCTT |



**Table S5.** Marker genes primer sequences collected

| Name            | Forward primers           | Reverse primers            |
|-----------------|---------------------------|----------------------------|
| <i>AtActin</i>  | TCGTTGCCCTCCAGAGA         | TACTCTGCCTTTGCGATCCA       |
| <i>AtABF3</i>   | CTTTGTTGATGGTGTGAGTGAGC   | GTGTTTCCACTATTACCATTGCTG   |
| <i>AtRD29A</i>  | TGAAAGGAGGAGGAGGAATGGTTGG | ACAAAACACACATAAACATCCAAAGT |
| <i>AtDREB2A</i> | GCGATTTTCATCTGGATCACATT   | GCAGGTTCCCTCGCATCCTT       |
| <i>AtERD1</i>   | CCACCGACTCCTCTCTGCTT      | AAGGGAGATTCCGAGATATGAAGA   |

**Table S6.** Collection of primer sequences related to vector construction

| Name                       | Forward primers                | Reverse primers                            |
|----------------------------|--------------------------------|--------------------------------------------|
| <i>PtDi19-2</i>            | ATGGATGCTGATTCATGGAGTGC<br>T   | CTATAAAATATCATCGAGAATTGT<br>AGACAACAACAGCC |
| <i>PtDi19-7</i>            | ATGGATGCTGATTCATGGAGTGC<br>T   | CTATAAAATGTCATCAGGAATTGT<br>AGAC           |
| <i>p1301-PtDi19-2</i>      | TGCGGTACCATGGATGCTGATTC<br>AT  | CGCTCTAGACTATAAAATATCATC<br>GAG            |
| <i>p1301-PtDi19-7</i>      | CGGGATCCATGGATGCTGATTCA<br>TGG | ACGCGTCGACCTATAAAATGTCAT<br>CAGG           |
| <i>p1305-PtDi19-2</i>      | TGCTCTAGAATGGATGCTGATTC<br>AT  | CGCGGATCCTATAAAATATCATCGA<br>GA            |
| <i>p1305-PtDi19-7</i>      | GCTCTAGAGCATGGATGCTGATT<br>CA  | TCCCCCGGGGGTAAAATGTCATC<br>A               |
| <i>pGBKT7-PtDi19-2</i>     | CGGGATCCAATTGTAGACAACA<br>A    | CGCGGATCCCTATAAAATATCATC<br>G              |
| <i>pGBKT7-PtDi19-2-N-C</i> | CGGGATCCAATTGTAGACAACA<br>A    | CGGGATCCAATTGTAGACAACAA                    |
| <i>pGBKT7-PtDi19-2-N</i>   | CGGAATTCATGGATGCTGATTCA<br>T   | CGGGATCCTCCATGTTGTAGG                      |
| <i>pGBKT7-PtDi19-7</i>     | GGAATTCCATGGATGCTGATTCA        | CGGGATCCCGCTATAAAATGTCA                    |

|                |                        |                          |
|----------------|------------------------|--------------------------|
| pGADT7-PtDi19- | TCCCCCGGGATGGATGCTGATT | CGGGATCCCTATAAAATGTCATCA |
| 7              | CAT                    | GGAATT                   |

---
